# Supplementary material for: Isolation and Characterization of Extracellular Vesicles from Arabidopsis thaliana Cell Culture and Investigation of the Specificities of Their Biogenesis
Source: MDPI journal article supplement (doi:10.3390/plants12203604), 2023-10-18
Supplement: s1 [file s1]

**Supplementary Table S1.** List of primers used in this study.

| Gene<br>(GenBank<br>accession no.) | Forward (5'–3')                                                           | Reverse (5'–3')              |
|------------------------------------|---------------------------------------------------------------------------|------------------------------|
| GAPDH<br>(AT1G13440)               | TTGGTGACAACAGGTCAAGC                                                      | AACTTGTCGCTCAATGCAAT<br>C    |
| TET8 (AT2G23810)                   | ACTTGGTGATTACTCTACTTG                                                     | AGGTTTGGCAGTCTGGATTA         |
| PEN1 (AT3G11820)                   | TCGTCCGAGTATAGAGAAAC                                                      | AGCACGGCCATGTCTAGAA          |
| Universal stem-loop<br>primer      | GAAAGAAGGCGAGGAGCAGATCGAGGAAGAAGACGGAAGA<br>ATGTGCGTCTCGCCTTCTTTCNNNNNNNN |                              |
| Universal reverse<br>primer        | -                                                                         | CGAGGAAGAAGAAGACGGA<br>AGAAT |
| miR157c<br>(AT3G18217)             | CGAGGAAGAAGAAGACGGAA<br>G                                                 | -                            |
| miR167a<br>(AT3G22886)             | TTGAAGCTGCCAGCATGATC                                                      | -                            |
| miR167c<br>(AT3G04765)             | TTGAAGCTGCCAGCATGATC                                                      | -                            |
| miR168a<br>(AT4G19395)             | TCGCTTGGTGCAGGTCGG                                                        | -                            |
| miR172e<br>(AT5G59505)             | ATGGAATCTTGATGATGCTGC                                                     | -                            |
| miR390b<br>(AT5G58465)             | CGAAGCTCAGGAGGGATAG                                                       | -                            |
| miR394b<br>(AT1G76135)             | ATTGGCATTCTGTCCACCTC                                                      | -                            |
| miR408<br>(AT2G47015)              | ATGCACTGCCTCTTCCCTG                                                       | -                            |
| miR8175<br>(AT2G05455)             | GATCCCCGGCAACGGCC                                                         | -                            |
| VPS37-1<br>(At3g53120)             | ATTCTACTCCCCTGGTTCTC                                                      | CGTCGATGATAGGTAGTAC<br>G     |
| VPS36 (AT5G04920)                  | AGGAACATCTACTATCTGCAG                                                     | CCGTATGTCCCAAACCTCCTT        |
| VPS2-1<br>(AT2G06530)              | GTATCGACATCAACCAAGAG                                                      | TCTATACCTCCACTGTCCTC         |
| VPS4 (AT4G26750)                   | CCTTCTCACTACCAAAACCC                                                      | TGATGAGTAAGGTGGAGGA<br>G     |
| BRO1 (AT1G15130)                   | TGAGGGCCTGAAGTTCTATG                                                      | TATGGGCCGGAGCTTCTATG         |
| TOL2 (AT1G06210)                   | GAAAGCCAAATCACACAGAG                                                      | TCAGATGCAGAGCCTCGAA<br>C     |
| FREE1 (AT1G20110)                  | GTTTGAGGGAAGGATCTGGG                                                      | TCAATGTGCGCTAACGAGG<br>A     |

**A**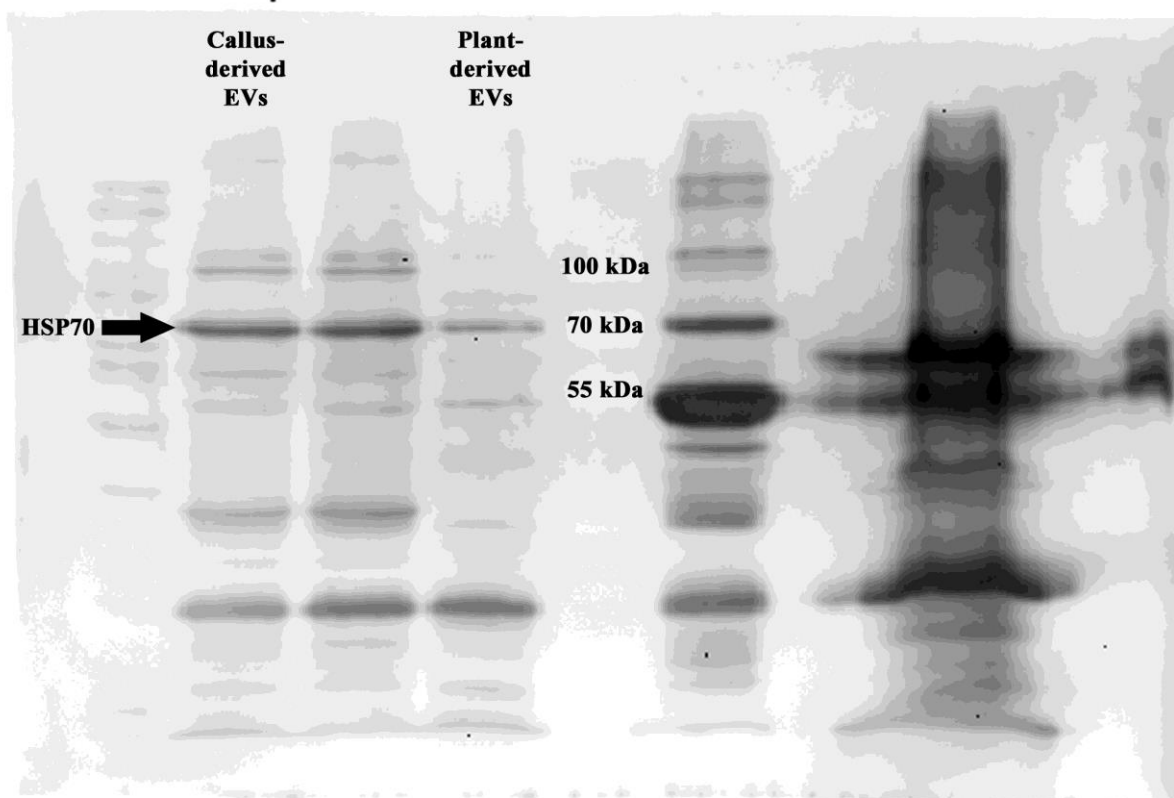**B**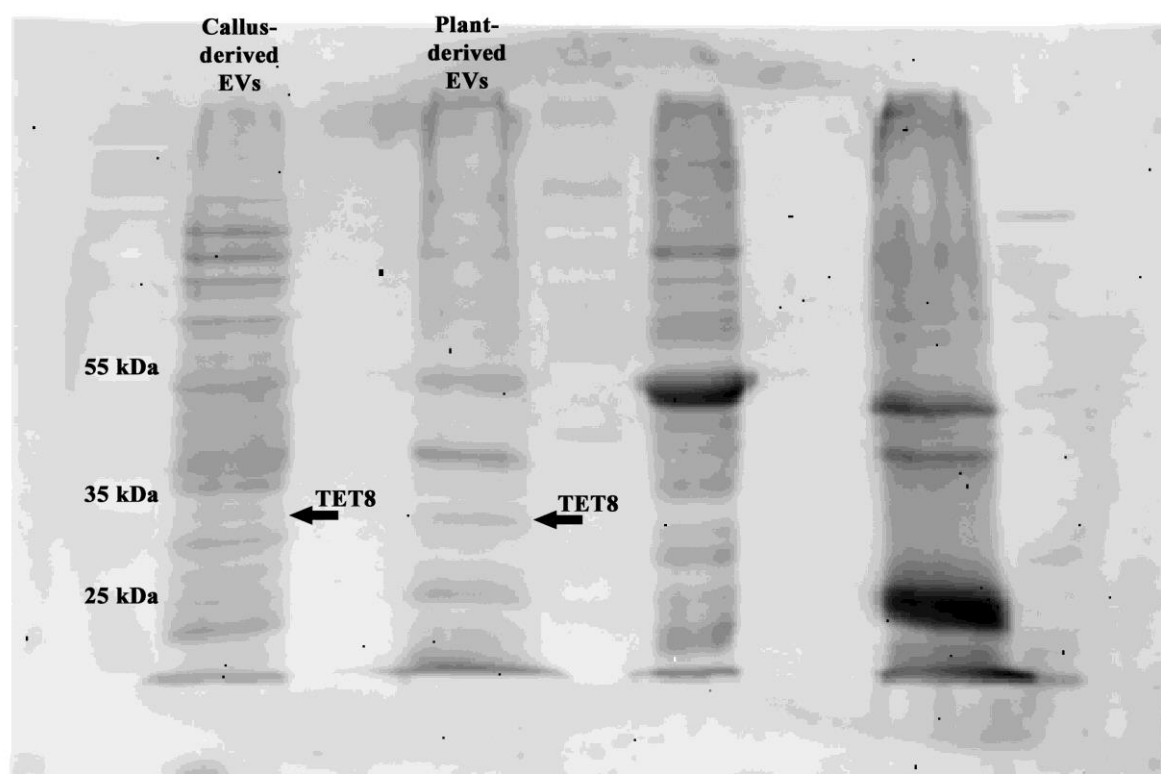

**Supplementary Figure S1.** Western blot analysis of EVs isolated from *A. thaliana* callus culture and apoplast washing fluid. Proteins (40  $\mu$ g) were resolved using a 10% SDS-PAGE gel. EVs marker proteins detected were: (A) HSP70 (71/72 kDa) and (B) TET8 (31 kDa).

**Supplementary Table S2.** Protein composition of EVs isolated from callus culture of *A. thaliana*.

| Name of protein                                 | Score | Mass  | Peptides | Unique peptides | Observed mass/sequences                                                                                                                                                                                                                                                                                                                                                                                                                                                                                                                                                                                                                                              |
|-------------------------------------------------|-------|-------|----------|-----------------|----------------------------------------------------------------------------------------------------------------------------------------------------------------------------------------------------------------------------------------------------------------------------------------------------------------------------------------------------------------------------------------------------------------------------------------------------------------------------------------------------------------------------------------------------------------------------------------------------------------------------------------------------------------------|
| Heat shock 70 kDa protein (HSP70)               | 159   | 72946 | 8        | 6               | 1417.6941 [K.EVDEVLLVGGMTR.V];<br>1453.6907 [R.EAELHAQKDKER.K];<br>1550.7545 [K.AVVTVPAYFNDAQR.Q];<br>1581.7806 [R.EAELHAQKDKERK.E];<br>1613.8314 [R.SRFETLVNHLIER.T];<br>1821.8857 [K.SQVFSTAADNQTQVGIR.V]                                                                                                                                                                                                                                                                                                                                                                                                                                                          |
| GDSL esterase/lipase (ESM1)                     | 89    | 44032 | 6        | 6               | 1038.4021 [R.SYFFFDGR.H];<br>1367.6017 [K.DLPQTYWPY GK.S];<br>1408.6409 [R.ELIVYPTGETMR.E];<br>1794.9683 [K.FVVQLLAPLGCLPIVR.Q] + Carbamidomethyl (C);<br>2100.9444<br>[K.ANPNADASAQQA FVTNVINR.L];<br>2570.1685<br>[K.AQEEMAHLLYGADPDVVQPM TVR.E]                                                                                                                                                                                                                                                                                                                                                                                                                   |
| Myrosinase 2 (BGL37)                            | 39    | 62692 | 4        | 4               | 1301.5325 [R.GLNVWDGFTHR.Y];<br>1301.6966 [R.GLNVWDGFTHR.Y];<br>1327.7294 [K.ASGLWYQSFLR.D];<br>2153.1903 [R.GINEDGINYYSG LIDGLIAR.N]                                                                                                                                                                                                                                                                                                                                                                                                                                                                                                                                |
| Germin-like protein subfamily 3 member 1 (GL31) | 42    | 21545 | 4        | 4               | 1436.3863 [A.SVQDFCVANLKR.A];<br>1799.8546 [R.AETPAGYPCIRPIHVK.A] + [+47.9847 at C9];<br>1808.8865 [R.AETPAGYPCIRPIHVK.A];<br>1964.9722 [K.RAETPAGYPCIRPIHVK.A]                                                                                                                                                                                                                                                                                                                                                                                                                                                                                                      |
| Vegetative storage protein 1 (VSP1)             | 60    | 30243 | 3        | 2               | 1536.7026 [R.VFKLPNPLY YVPS];<br>1388.9514<br>[K.GYNIVGNIGDQWADLVEDTPGR.V];<br>2517.0282<br>[K.KGYNIVGNIGDQWADLVEDTPGR.V]                                                                                                                                                                                                                                                                                                                                                                                                                                                                                                                                            |
| Beta carbonic anhydrase 1 (BCA1)                | 57    | 37426 | 1        | 1               | 1906.1378 [R.EAVNVSLANLLTYPFVR.E]                                                                                                                                                                                                                                                                                                                                                                                                                                                                                                                                                                                                                                    |
| UDP-arabinopyranose mutase 1 (RGP1)             | 140   | 40602 | 14       | 4               | 1178.5557 [K.TGLPYIYH SK.A];<br>1444.5257 [R.YDDMWAGWCIK.V] + [+57.0215 at C9]; 1460.5184<br>[R.YDDMWAGWCIK.V] + [+72.9952 at I10];<br>1606.6586 [K.YIFTIDDDCFVAK.D] + [+57.0215 at C9]; 1729.6889<br>[K.GTLFPMC GMNLA FDR.E] + [+57.0215 at M6];<br>1742.7338 [K.GTLFPMC GMNLA FDR.E] + [+70.0419 at C7];<br>1745.6852 [K.GTLFPMC GMNLA FDR.E] + [+72.9952 at L3];<br>1786.7728 [K.TIAVPEGFDYELYNR.N];<br>1925.8777 [K.GIFWQEDIIPFFQSAK.L];<br>2121.9427<br>[R.ELIGPAMYFGLMGD GQPIGR.Y];<br>2137.9395<br>[R.ELIGPAMYFGLMGD GQPIGR.Y] + [+15.9949 at Y8];<br>2365.0337 [K.NLLCPSTPFFFN TLYDPYR.E; + [+57.0215 at C4];<br>3035.4605<br>[R.EGVSTAVSHGLWLNIPDYDAPTQLVKP |

|                                                                                       |     |       |    |   |                                                                                                                                                                                                                                                                                                                                                                                                                                                                                                                                                                                                                                                                      |
|---------------------------------------------------------------------------------------|-----|-------|----|---|----------------------------------------------------------------------------------------------------------------------------------------------------------------------------------------------------------------------------------------------------------------------------------------------------------------------------------------------------------------------------------------------------------------------------------------------------------------------------------------------------------------------------------------------------------------------------------------------------------------------------------------------------------------------|
|                                                                                       |     |       |    |   | K.E]; 3217.6721<br>[M.VEPANTVGIPVNHIPLLKDELDIVIPTIR.<br>N] + [+42.0470 at K18]                                                                                                                                                                                                                                                                                                                                                                                                                                                                                                                                                                                       |
| UDP-<br>arabinopyranose<br>mutase 2 (RGP2)                                            | 53  | 40864 | 13 | 5 | 1178.5557 [K.TGLPYIYHSK.A];<br>1444.5257 [R.YDDMWAGWCIK.V] +<br>[+57.0215 at C9];<br>1460.5184 [R.YDDMWAGWCIK.V] +<br>[+72.9952 at I10];<br>1606.6586 [K.YIFTIDDDCFVAK.D] +<br>[+57.0215 at C9];<br>1729.6889 [K.GTLFPMCGMNLAFFDR.E] +<br>[+57.0215 at M6];<br>1742.7338 [K.GTLFPMCGMNLAFFDR];<br>1745.6852 [K.GTLFPMCGMNLAFFDR.D] +<br>[+72.9952 at L3];<br>1767.7332 [K.IHVPEGYDYELYNR.N];<br>1895.8272 [K.KIHVPEGYDYELYNR.N];<br>2107.9247<br>[R.DLIGPAMYFGLMGDGPGR.Y];<br>2137.9395<br>[R.DLIGPAMYFGLMGDGPGR.Y] +<br>[+29.9742 at Y8];<br>2351,0200 [K.NLLCPSSPFFNTLYDPYR.E] +<br>[+57.0215 at N-term N];<br>3035.4605<br>[R.EGVSTAVSHGLWLNIPDYDAPTQLVKP<br>K.E] |
| UDP-ara<br>binopyranose<br>mutase 3 (RGP3)                                            | 96  | 41254 | 7  | 2 | 1444.5257 [R.YDDMWAGWCVK.V; +<br>[+71.0371 at C9];<br>1460.5184 [R.YDDMWAGWCVK.V] +<br>[+87.0143 at C-term K];<br>1729.6889 [K.GTLFPMCGMNLAFFDR.E] +<br>[+57.0215 at M6];<br>1742.7338 [K.GTLFPMCGMNLAFFDR.E] +<br>[+70.0419 at C7];<br>1745.6852 [K.GTLFPMCGMNLAFFDR.E] +<br>[+72.9952 at L3];<br>2121.9427<br>[R.ELIGPAMYFGLMGDGPGR.Y];<br>2137.9395<br>[R.ELIGPAMYFGLMGDGPGR.Y] +<br>[+15.9949 at Y8]                                                                                                                                                                                                                                                             |
| EP1-like<br>glycoprotein 3<br>(EP1L3)                                                 | 61  | 49020 | 2  | 2 | 960.5236 [R.WVWEANR.G];<br>2287.1975<br>[R.VVNEGGYTDYSPIEYNPDVR.G]                                                                                                                                                                                                                                                                                                                                                                                                                                                                                                                                                                                                   |
| Nitrilase 1 (NRL1)                                                                    | 90  | 38128 | 3  | 3 | 1603.8037 [K.YHASAIHVPGPVAR.L];<br>1821.9265 [K.GAELVLFPEFFIGGYPR.G]                                                                                                                                                                                                                                                                                                                                                                                                                                                                                                                                                                                                 |
| Nitrilase 2 (NRL2)                                                                    | 52  | 37130 | 1  | 1 | 1837.9168 [K.GSELVVFPEAFIGGYPR.G]                                                                                                                                                                                                                                                                                                                                                                                                                                                                                                                                                                                                                                    |
| Polygalacturonase<br>inhibitor 1 (PGIP1)                                              | 113 | 36666 | 3  | 3 | 1078.3897 [K.TTWSIDLSR.N];<br>1649.5307 [K.LQTFDSYSYFHNK.C];<br>2076.8239 [K.LTGSIPESFGSFGTVPDLR.L]                                                                                                                                                                                                                                                                                                                                                                                                                                                                                                                                                                  |
| Phosphoglycerate<br>kinase 3 (PGKY3)                                                  | 28  | 42105 | 1  | 1 | 1465.6484 [K.FLKPSVAGFLMQK.E]                                                                                                                                                                                                                                                                                                                                                                                                                                                                                                                                                                                                                                        |
| Probable<br>xyloglucan<br>endotransglucosyla<br>se/hydrolase<br>protein 11<br>(XTH11) | 36  | 31919 | 1  | 1 | 2182.1109 [K.NSGSGFESQLIYGSGYFNVR.I]                                                                                                                                                                                                                                                                                                                                                                                                                                                                                                                                                                                                                                 |
| Alpha-xylosidase 1                                                                    | 41  | 10233 | 3  | 3 | 1376.6194 [K.TVSWWGDEIKR.F]; 1471.6440                                                                                                                                                                                                                                                                                                                                                                                                                                                                                                                                                                                                                               |

|                                                                  |    |       |   |   |                                                                                                                                                                                                                                                                                       |
|------------------------------------------------------------------|----|-------|---|---|---------------------------------------------------------------------------------------------------------------------------------------------------------------------------------------------------------------------------------------------------------------------------------------|
| (XYL1)                                                           |    |       |   |   | [R.WIEVGAFYPFSR.D]; 1681.6702<br>[R.QELYQWDTVADSAR.N]                                                                                                                                                                                                                                 |
| Beta-glucosidase<br>22 (BGL22)                                   | 27 | 59743 | 6 | 4 | 1714.6510 [R.CSGHNADVAVDFFHR.Y] +<br>Pyro-carbamidomethyl (N-term C);<br>1731.6862 [R.CSGHNADVAVDFFHR.Y] +<br>[+57.0215 at S2];<br>2689.2577<br>[R.SGYEAYLVSHNLLNAHAEAVEVFR.Q];<br>2888.3468<br>[K.IGIAHSPAWFEPHDLKDSNDVPTVSR.V]                                                      |
| Putative CCR4-<br>associated factor 1<br>homolog 4<br>(CAF1D)    | 35 | 34840 | 2 | 2 | 1075.4448 [K.IAESCGLSSR.F];<br>1237.5222 [K.KIAESCGLSSR.F]                                                                                                                                                                                                                            |
| Beta-glucosidase<br>23 (BGL23)                                   | 82 | 59683 | 6 | 6 | 950.6664 [K.NLNTDAFR.M];<br>1250.8489 [R.GPALWDIYCR.R] +<br>Carbamidomethyl (C);<br>2251.4879<br>[K.NAQNYAIGSKPLTAALNVYSR.G];<br>2706.6729<br>[R.SGYEAYLVTHNLLISHAEAVEAYR.K];<br>2834.7679<br>[R.SGYEAYLVTHNLLISHAEAVEAYRK.C];<br>3169.8278<br>[K.ASTDFVGLNYYTSVFSNHLEKPDPSKPR.<br>W] |
| Probable UDP-<br>arabinopyranose<br>mutase 4 (RGP4)              | 37 | 41839 | 2 | 2 | 1767.8936 [K.IRVPEGYDYELYNR.N] + [-<br>19.0422 at R2];<br>1786.9365 [K.IRVPEGYDYELYNR.N]                                                                                                                                                                                              |
| Sucrose synthase 4<br>(SUS4)                                     | 59 | 92944 | 7 | 7 | 1021.6264 [R.WISSQMNR.V];<br>1043.6218 [K.GGAFFEFLR.S];<br>1053.6574 [R.SFTLPGLYR.V];<br>1267.8453 [R.IKQQGLNITPR.I];<br>1282.7649 [K.YIGDGVEFLNR.H];<br>1463.9367 [R.IQNLNTLQHNL.R.K];<br>1539.0409 [R.LRELVNLVVVGDR.R]                                                              |
| Glyceraldehyde-3-<br>phosphate<br>dehydrogenase<br>GAPC1 (G3PC1) | 25 | 36891 | 2 | 2 | [K.LVSWYDNEWGYSSR.V];<br>[K.GILGYTEDDVVSTDFVGDNR.S]                                                                                                                                                                                                                                   |
